# Supplementary material for: Spatiotemporal Mapping of the Oxytocin Receptor at Single-Cell Resolution in the Postnatally Developing Mouse Brain
Source: PubMed Central journal article supplement (PMC11794781; doi:10.1007/s12264-024-01296-x), 2024-09-15
Supplement: 12264_2024_1296_MOESM1_ESM.pdf [file 12264_2024_1296_MOESM1_ESM.pdf]

## Supplementary Information

### Supplementary Figures

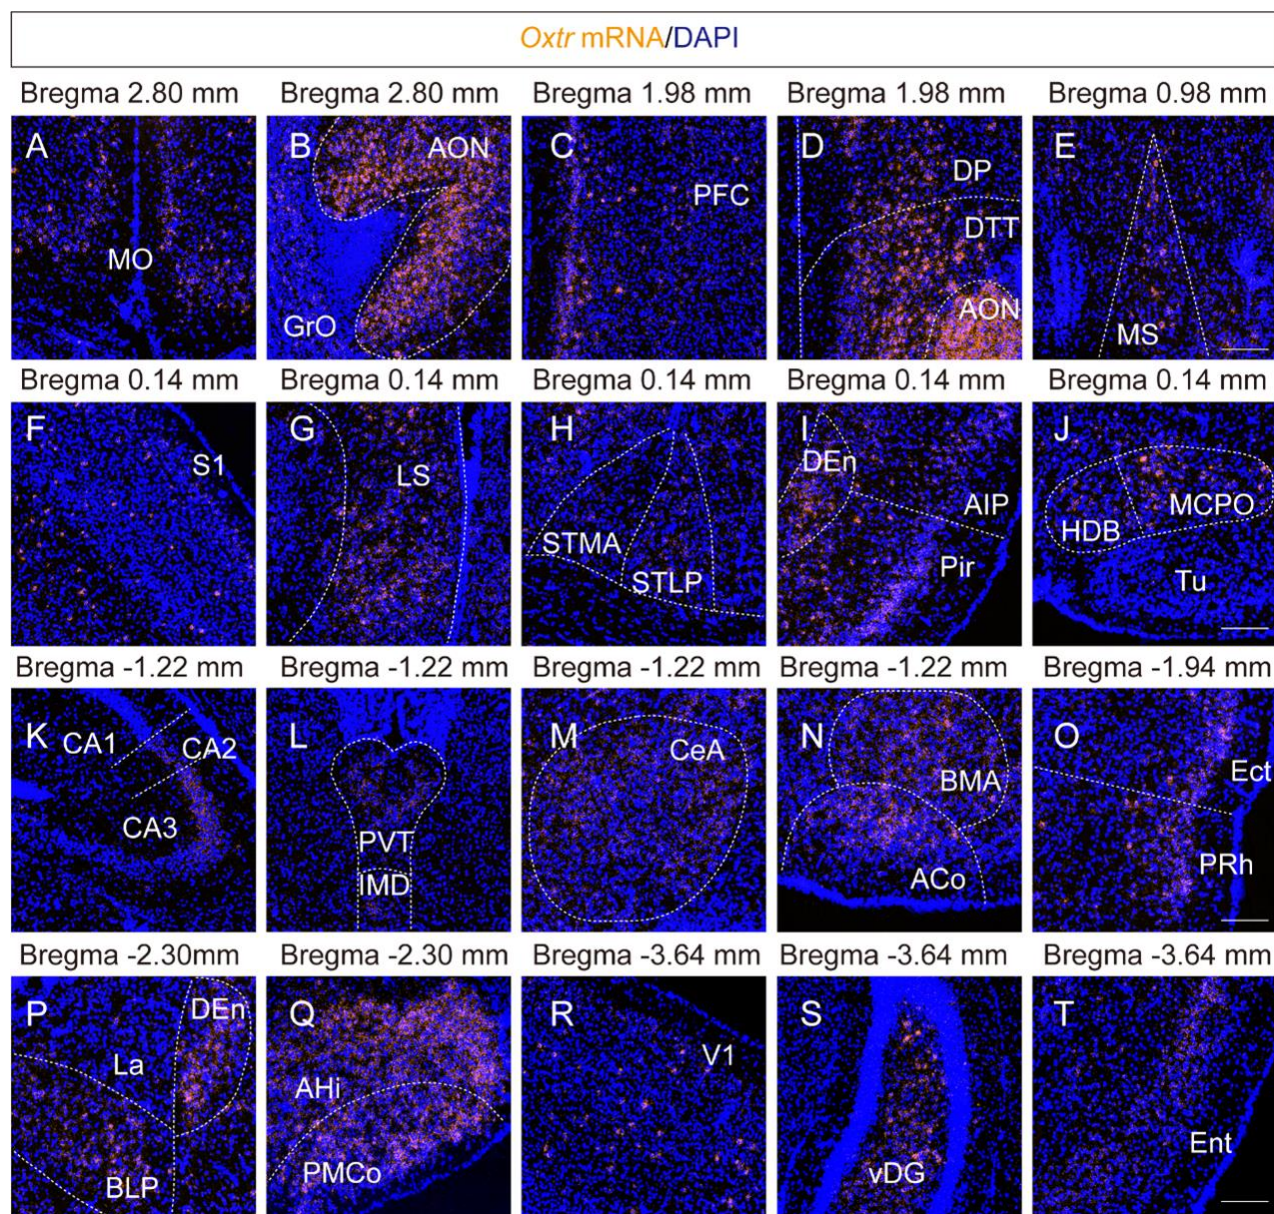

**Fig. S1** The expression pattern of *Oxtr* in the male mouse brain at P14. **A-T** Representative images of the medial orbital cortex (**A**), olfactory bulb (**B**), prefrontal cortex (**C**), dorsal peduncular cortex and dorsal taenia tecta (**D**), medial septal nucleus (**E**), primary somatosensory cortex (**F**), lateral septal nucleus (**G**), bed nucleus of the stria terminalis (**H**), insular cortex and piriform cortex (**I**), nucleus of the diagonal band and magnocellular preoptic nucleus (**J**), hippocampus (**K**), paraventricular thalamic nucleus (**L**), central amygdaloid nucleus (**M**), basomedial amygdaloid nucleus and anterior cortical amygdaloid area (**N**), entorhinal cortex and perirhinal cortex (**O**), dorsal endopiriform nucleus and basolateral amygdaloid nucleus, posterior part (**P**), amygdalo-hippocampal area and posteromedial cortical amygdaloid area (**Q**), primary visual cortex (**R**), ventral DG (**S**), and entorhinal cortex (**T**). The full names of all abbreviations are listed in Table S1.

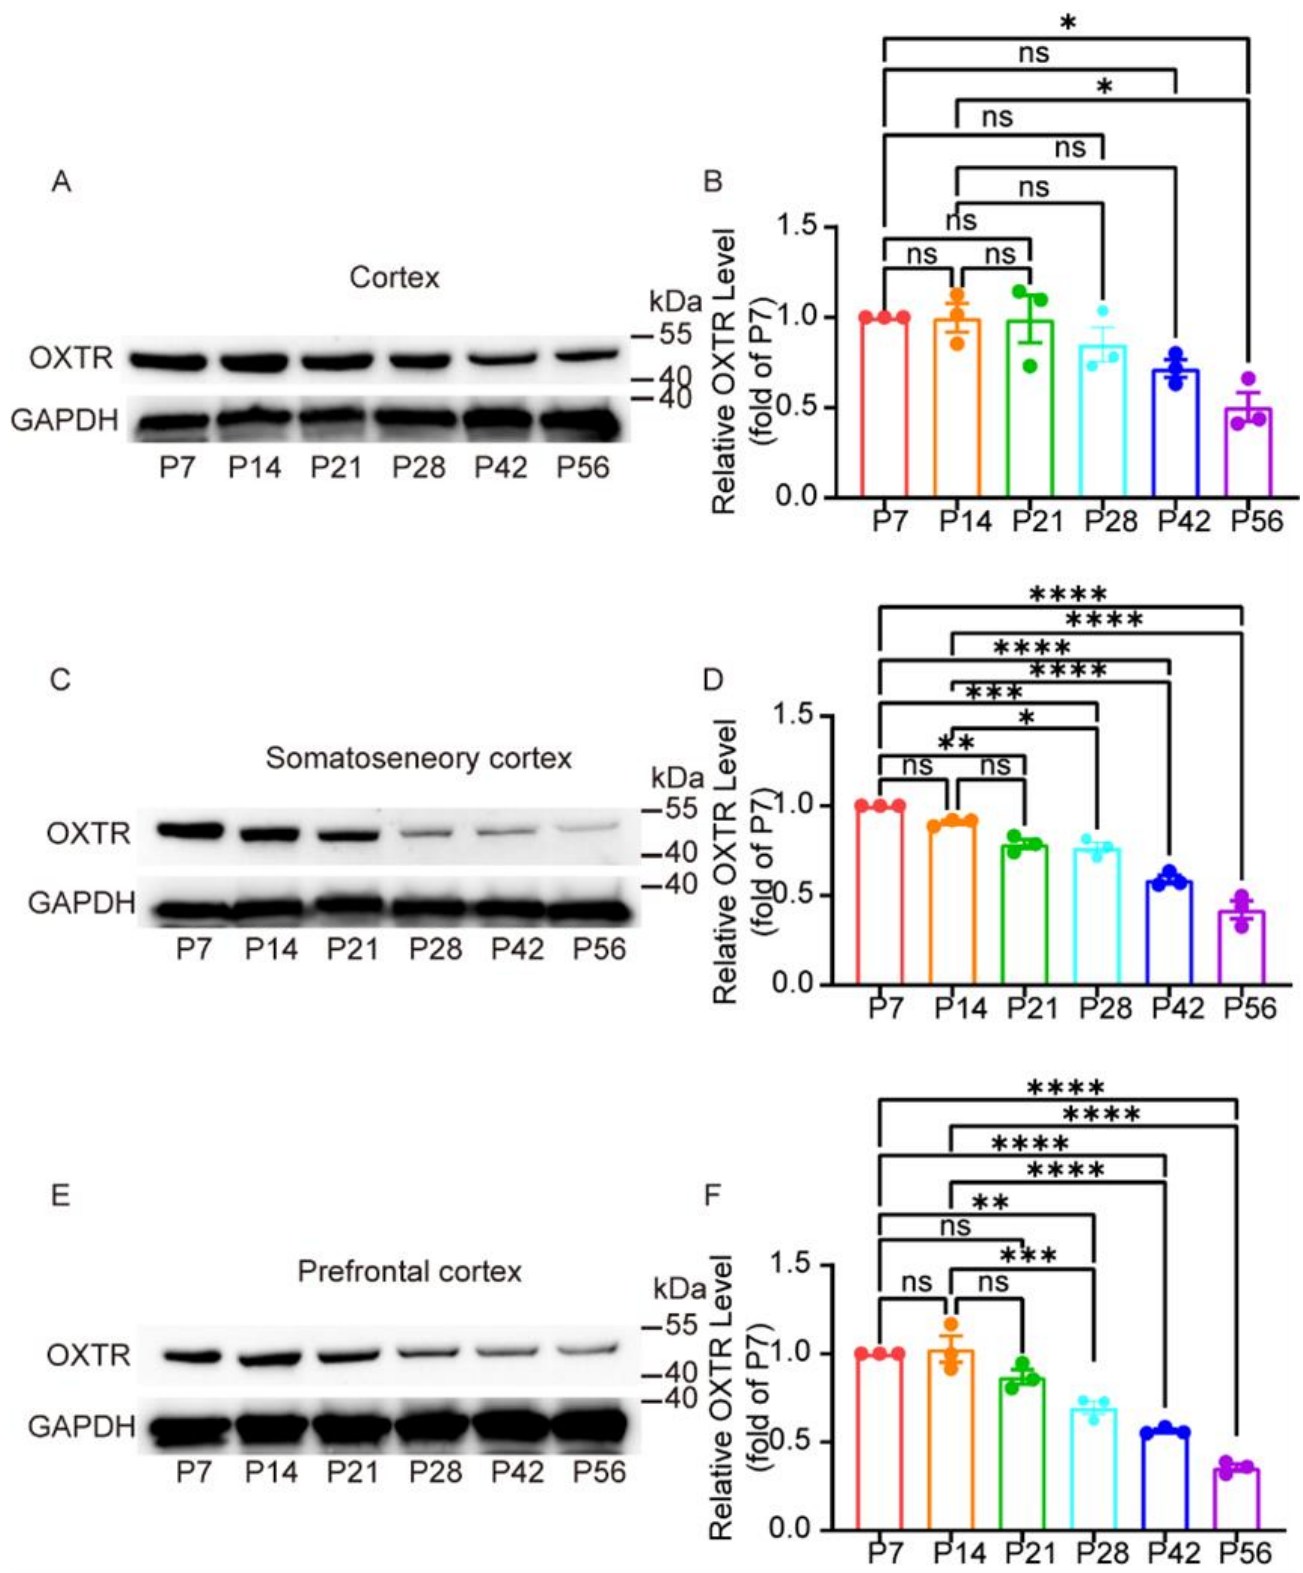

**Fig. S2** The expression trajectories of OXTR protein in the cortex. **A-F** Representative Western blots and autoradiograms with quantitative results for the expression trajectories of OXTR in the entire cortex (**A, B**), somatosensory cortex (**C, D**) and prefrontal cortex (**E, F**) ( $n = 3$ ). Data are presented as the mean  $\pm$  SEM.

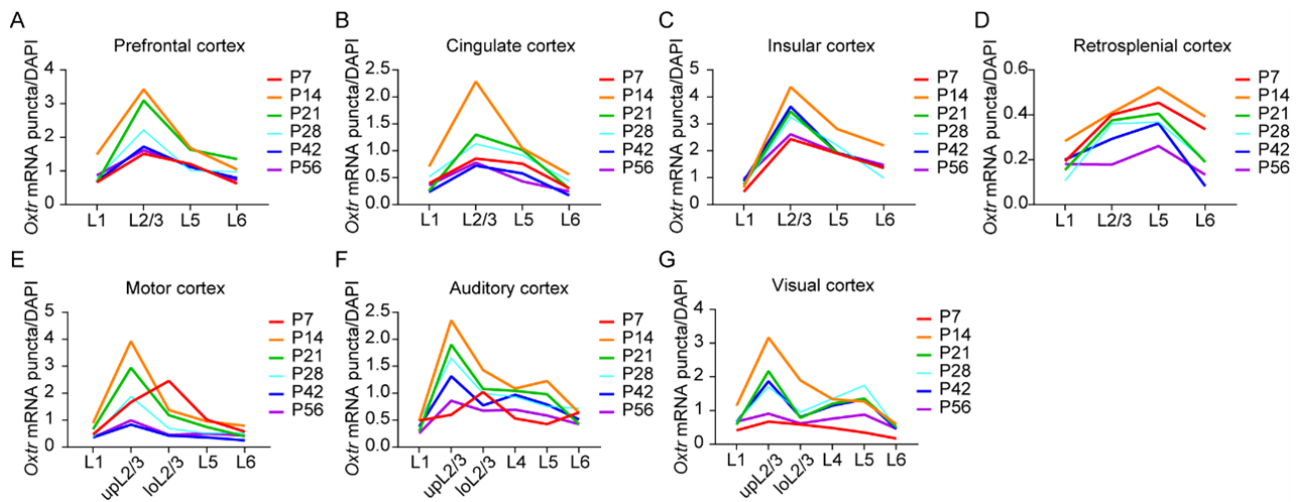

**Fig. S3** The *OxtR* expression trajectories of each layer in different cortices. **A-G** The *OxtR* expression trajectories of different layers in the prefrontal (**A**), cingulate (**B**), insular (**C**), retrosplenial (**D**), motor (**E**), auditory (**F**), and visual cortices (**G**) ( $n = 5$ ). Data are presented as the mean.

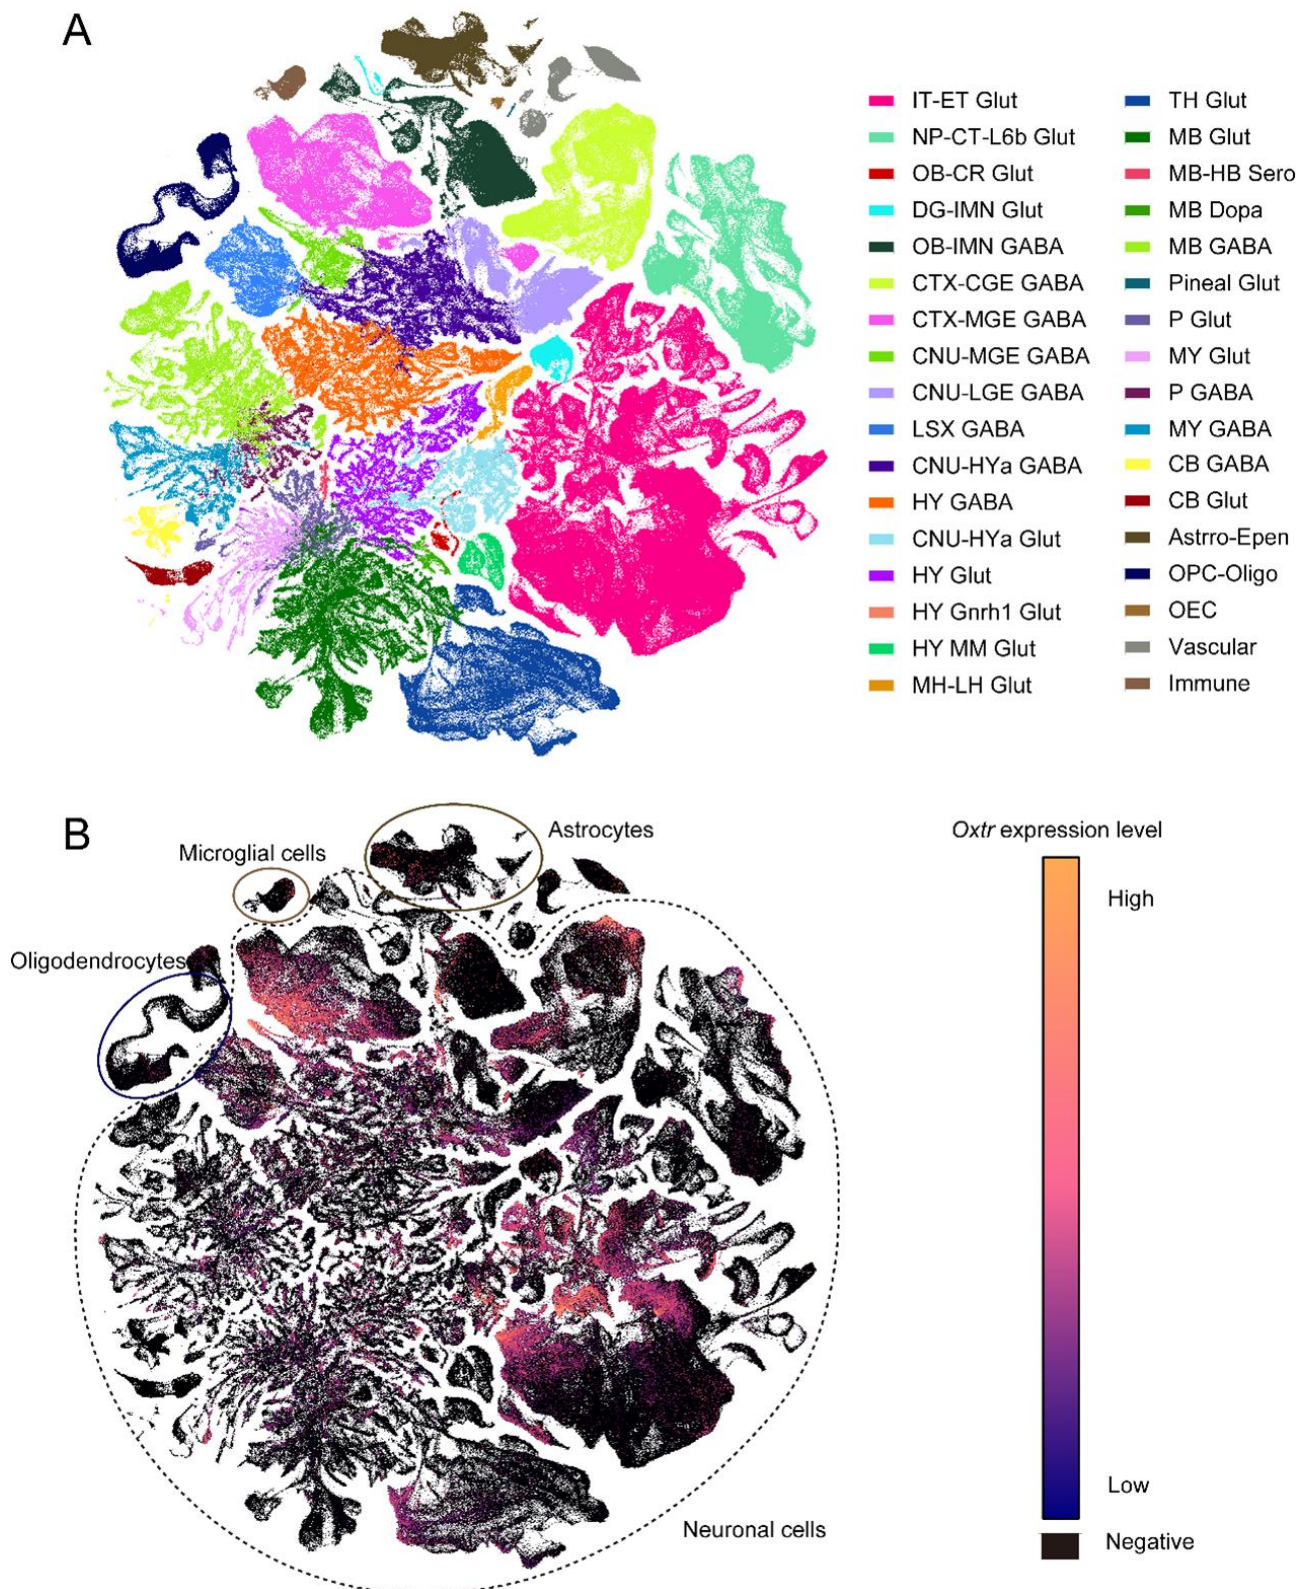

**Fig. S4** The expression patterns of *Oxt* in different cell types. **A** UMAP plot of single-cell data colored by different cell classes. **B** UMAP plot of single-cell data colored by the expression level of *Oxt*. (the figures are downloaded and modified from <https://knowledge.brain-map.org/>)

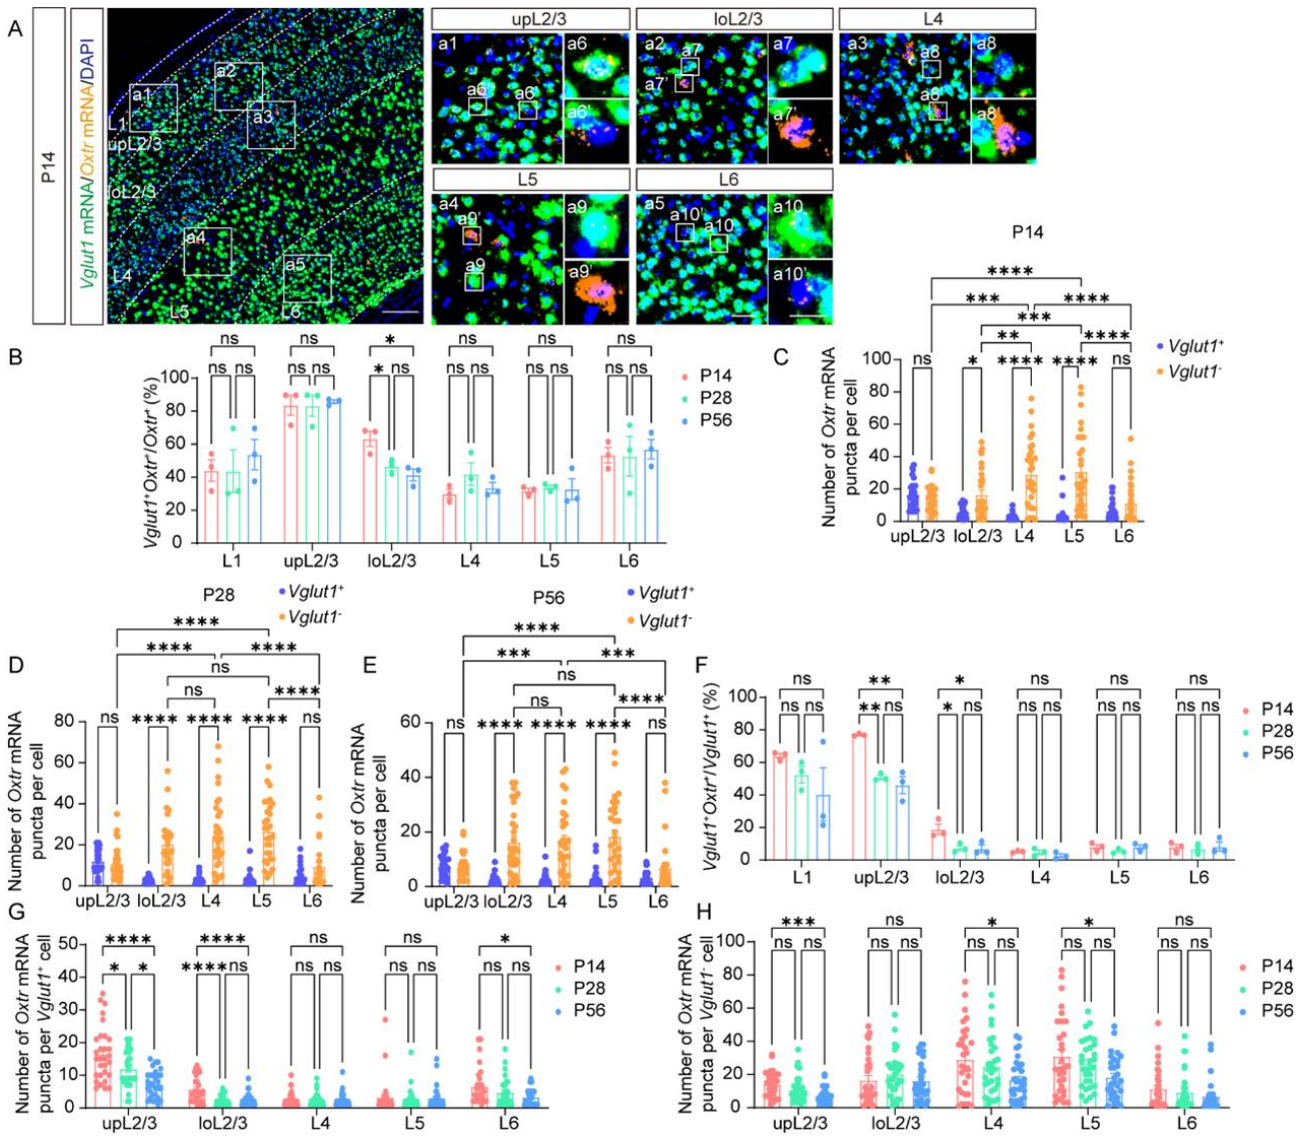

**Fig. S5** The expression pattern of *Oxt* in *Vglut1*<sup>+</sup> cells and *Vglut1*<sup>-</sup> cells in the somatosensory cortex. **A** Representative images of *Oxt* mRNA (orange) co-labeling with *Vglut1* mRNA (green) from the somatosensory cortex at P14. Scale bar, 200  $\mu$ m. **a1-a5** Representative images of each layer. Scale bar, 50  $\mu$ m. **a6-a10** Representative images of *Vglut1*<sup>+</sup> cells. **a6'-a10'** Representative images of *Vglut1*<sup>-</sup> cells. Scale bar, 20  $\mu$ m. **B** The ratio of *Vglut1*<sup>+</sup> cells among *Oxt*<sup>+</sup> cells of each layer ( $n = 3$ ). **C-E** The number of *Oxt* mRNA puncta in different cell types and layers from somatosensory cortex at P14 (**C**), P28 (**D**), and P56 (**E**) ( $n = 30$  cells, 3 mice). **F** The ratio of *Oxt*<sup>+</sup> cells among *Vglut1*<sup>+</sup> cells of each layer ( $n = 3$ ). **G, H** Developmental comparison of the number of *Oxt* mRNA puncta in *Vglut1*<sup>+</sup> cells (**G**) and *Vglut1*<sup>-</sup> cells (**H**) of each layer ( $n = 30$  cells, 3 mice). Data are presented as the mean  $\pm$  SEM. \* $P < 0.05$ , \*\* $P < 0.01$ , \*\*\* $P < 0.001$ , \*\*\*\* $P < 0.0001$ , one-way ANOVA with Tukey's multiple comparisons test (**B, F-H**) or two-way ANOVA with Tukey's multiple comparisons test (**C-E**).

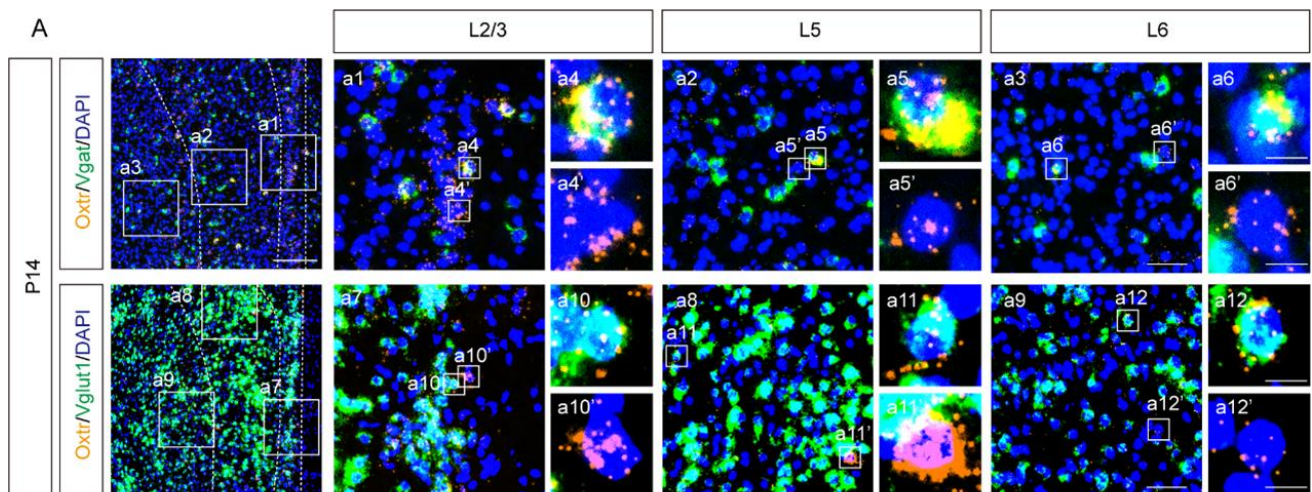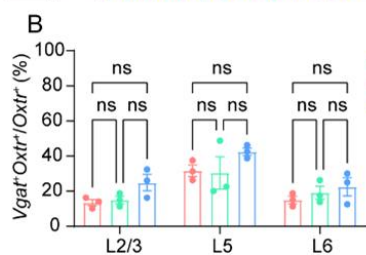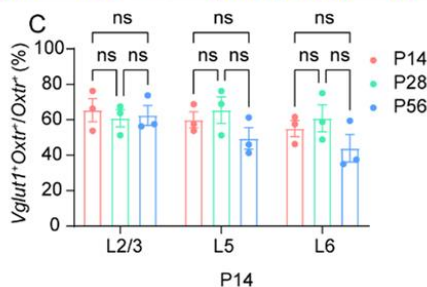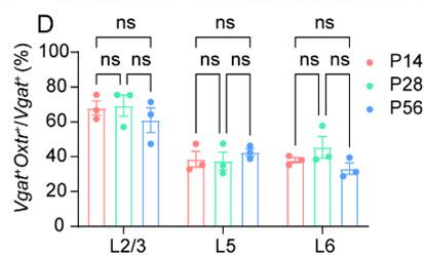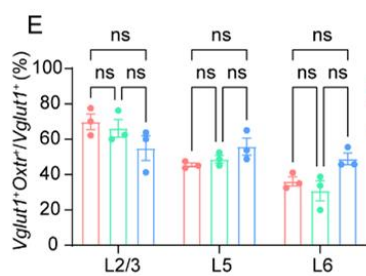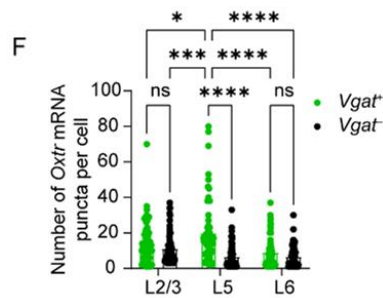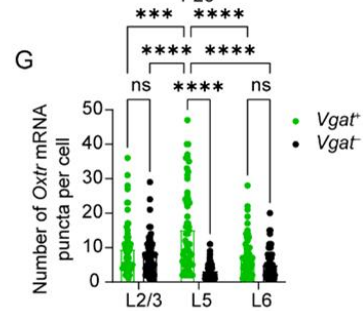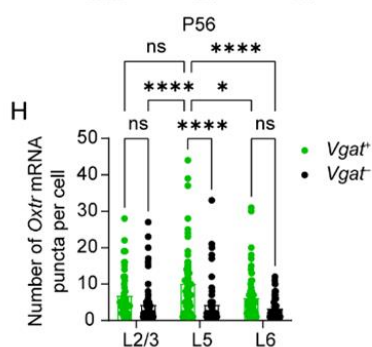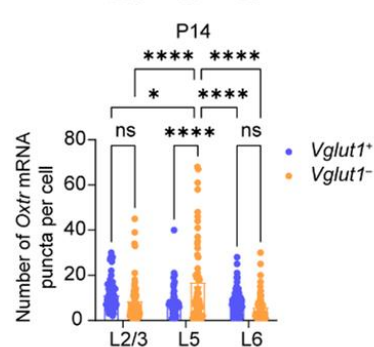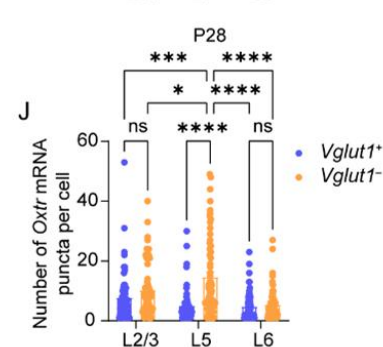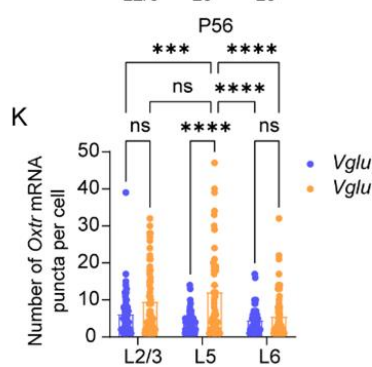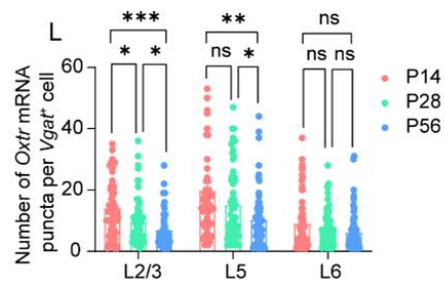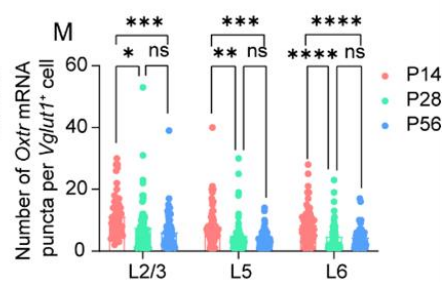

**Fig. S6** The expression pattern of *Oxtr* in the prefrontal cortex. **A** Representative images of *Oxtr* mRNA (orange) co-labeling with *Vgat* mRNA or *Vglut1* mRNA (green) at P14. Scale bar, 200  $\mu\text{m}$ . **a1-a3, a7-a9** Representative images of each layer. Scale bar, 50  $\mu\text{m}$ . **a4-a6** Representative images of *Vgat*<sup>+</sup> cells. **a4'-a6'** Representative images of *Vgat*<sup>-</sup> cells. **a10-a12** Representative images of *Vglut1*<sup>+</sup> cells. **a10'-a12'** Representative images of *Vglut1*<sup>-</sup> cells. Scale bar, 20  $\mu\text{m}$ . **B** The ratio of *Vgat*<sup>+</sup> cells among *Oxtr*<sup>+</sup> cells in each layer ( $n = 3$ ). **C** The ratio of *Vglut1*<sup>+</sup> cells among *Oxtr*<sup>+</sup> cells in each layer ( $n = 3$ ). **D** The ratio of *Oxtr*<sup>+</sup> cells among *Vgat*<sup>+</sup> cells in each layer ( $n = 3$ ). **E** The ratio of *Oxtr*<sup>+</sup> cells among *Vglut1*<sup>+</sup> cells in each layer ( $n = 3$ ). **F-K** The number of *Oxtr* mRNA puncta in different cell types and layers from somatosensory cortex at P14 (**F, I**), P28 (**G, J**), and P56 (**H, K**) ( $n = 60$  cells, 3 mice). **L, M** Developmental comparison of the number of *Oxtr* mRNA puncta in *Vgat*<sup>+</sup> cells (**L**) and *Vglut1*<sup>+</sup> cells (**M**) in each layer ( $n = 60$  cells, 3 mice). Data are presented as the mean  $\pm$  SEM. \* $P < 0.05$ , \*\* $P < 0.01$ , \*\*\* $P < 0.001$ , \*\*\*\* $P < 0.0001$ , one-way ANOVA with Tukey's multiple comparisons test (**B-E, L, M**) or two-way ANOVA with Tukey's multiple comparisons test (**F-K**).

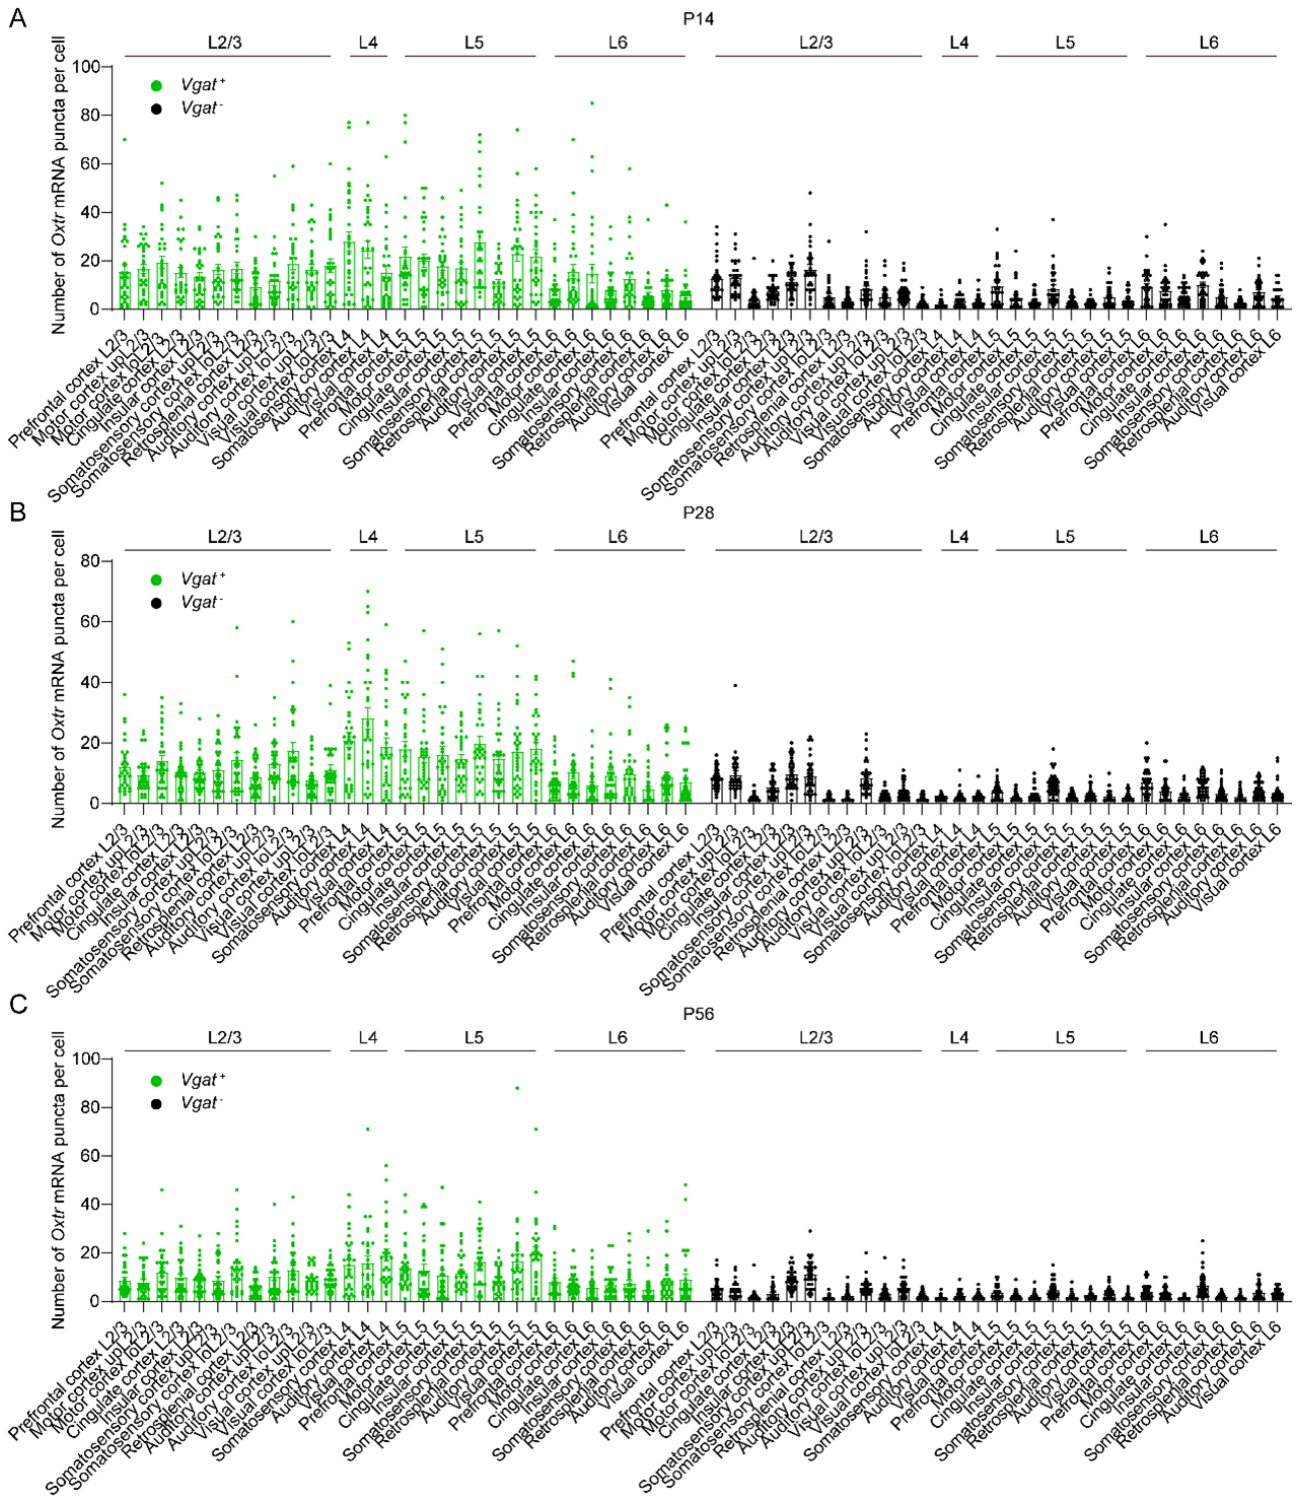

**Fig. S7** Layered *Oxt* distributions between *Vgat*<sup>+</sup> cells and *Vgat*<sup>-</sup> cells in different cortices. **A-C** The number of *Oxt* mRNA puncta in different cell types and layers from different cortices at P14 (**A**), P28 (**B**), and P56 (**C**). Data are presented as the mean ± SEM.





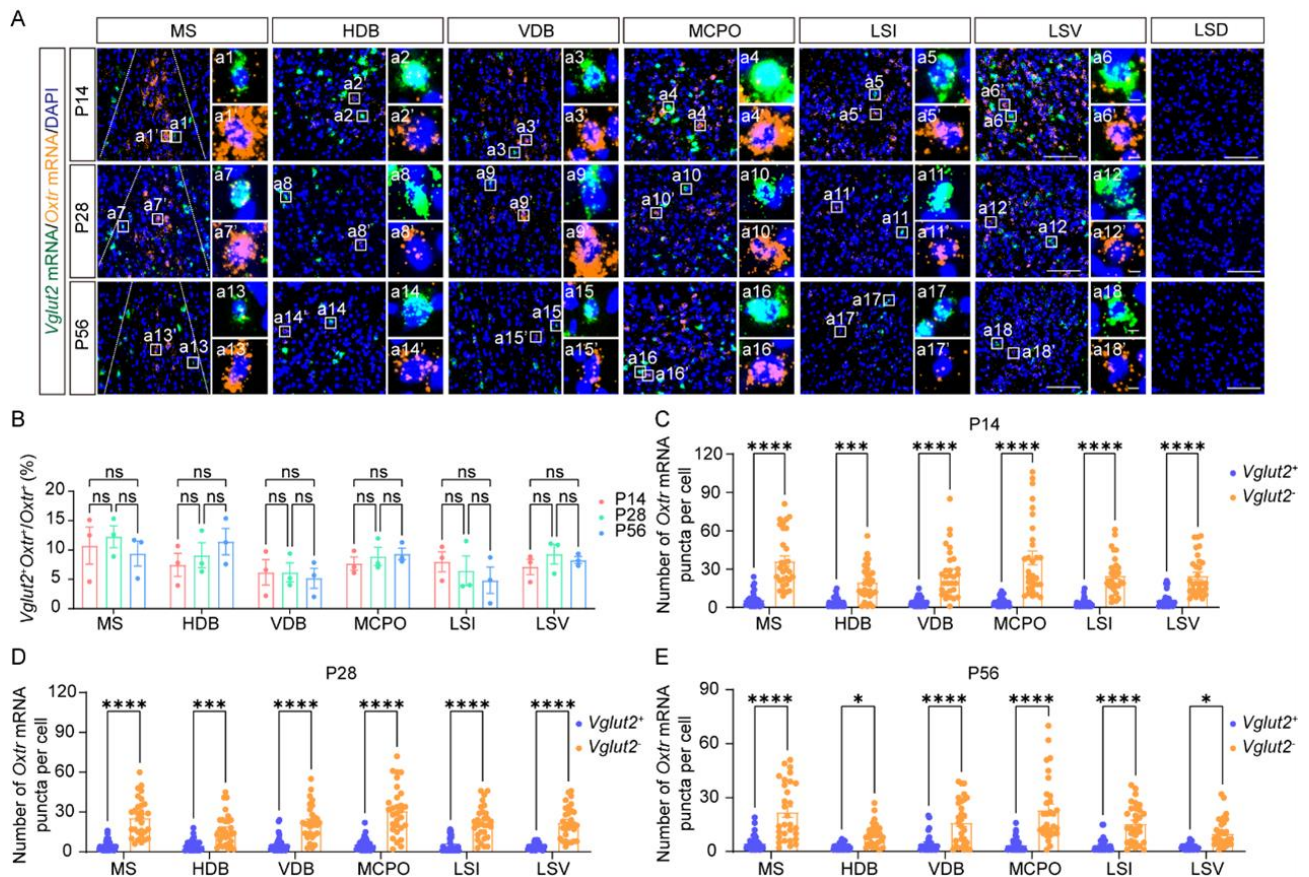

**Fig. S9** The expression pattern of *Oxt* in *Vglut2*<sup>+</sup> cells and *Vglut2*<sup>-</sup> cells in the basal forebrain. **A** Representative images of *Oxt* mRNA (orange) co-labeling with *Vglut2* mRNA (green) from the BF at different periods (No *Vglut2* signal was detected in the dorsal part of the lateral septal nucleus, thus is not included). Scale bar, 100  $\mu$ m. **a1-a18** Representative images of *Vglut2*<sup>+</sup> cells. Scale bar, 5  $\mu$ m. **a1'-a18'** Representative images of *Vglut2*<sup>-</sup> cells. Scale bar, 5  $\mu$ m. **B** The ratio of *Vglut2*<sup>+</sup> cells among *Oxt*<sup>+</sup> cells of subregions in the BF ( $n = 3$ ). **C-E** The number of *Oxt* mRNA puncta in different cell types and subregions from the BF at P14 (**C**), P28 (**D**), and P56 (**E**) ( $n = 30$  cells, 3 mice). Data are presented as the means  $\pm$  SEM. \* $P < 0.05$ , \*\*\*\* $P < 0.0001$ , one-way ANOVA with Tukey's multiple comparisons test (**B**) or unpaired t-test (**C-E**). The full names of all abbreviations are listed in Table S1.

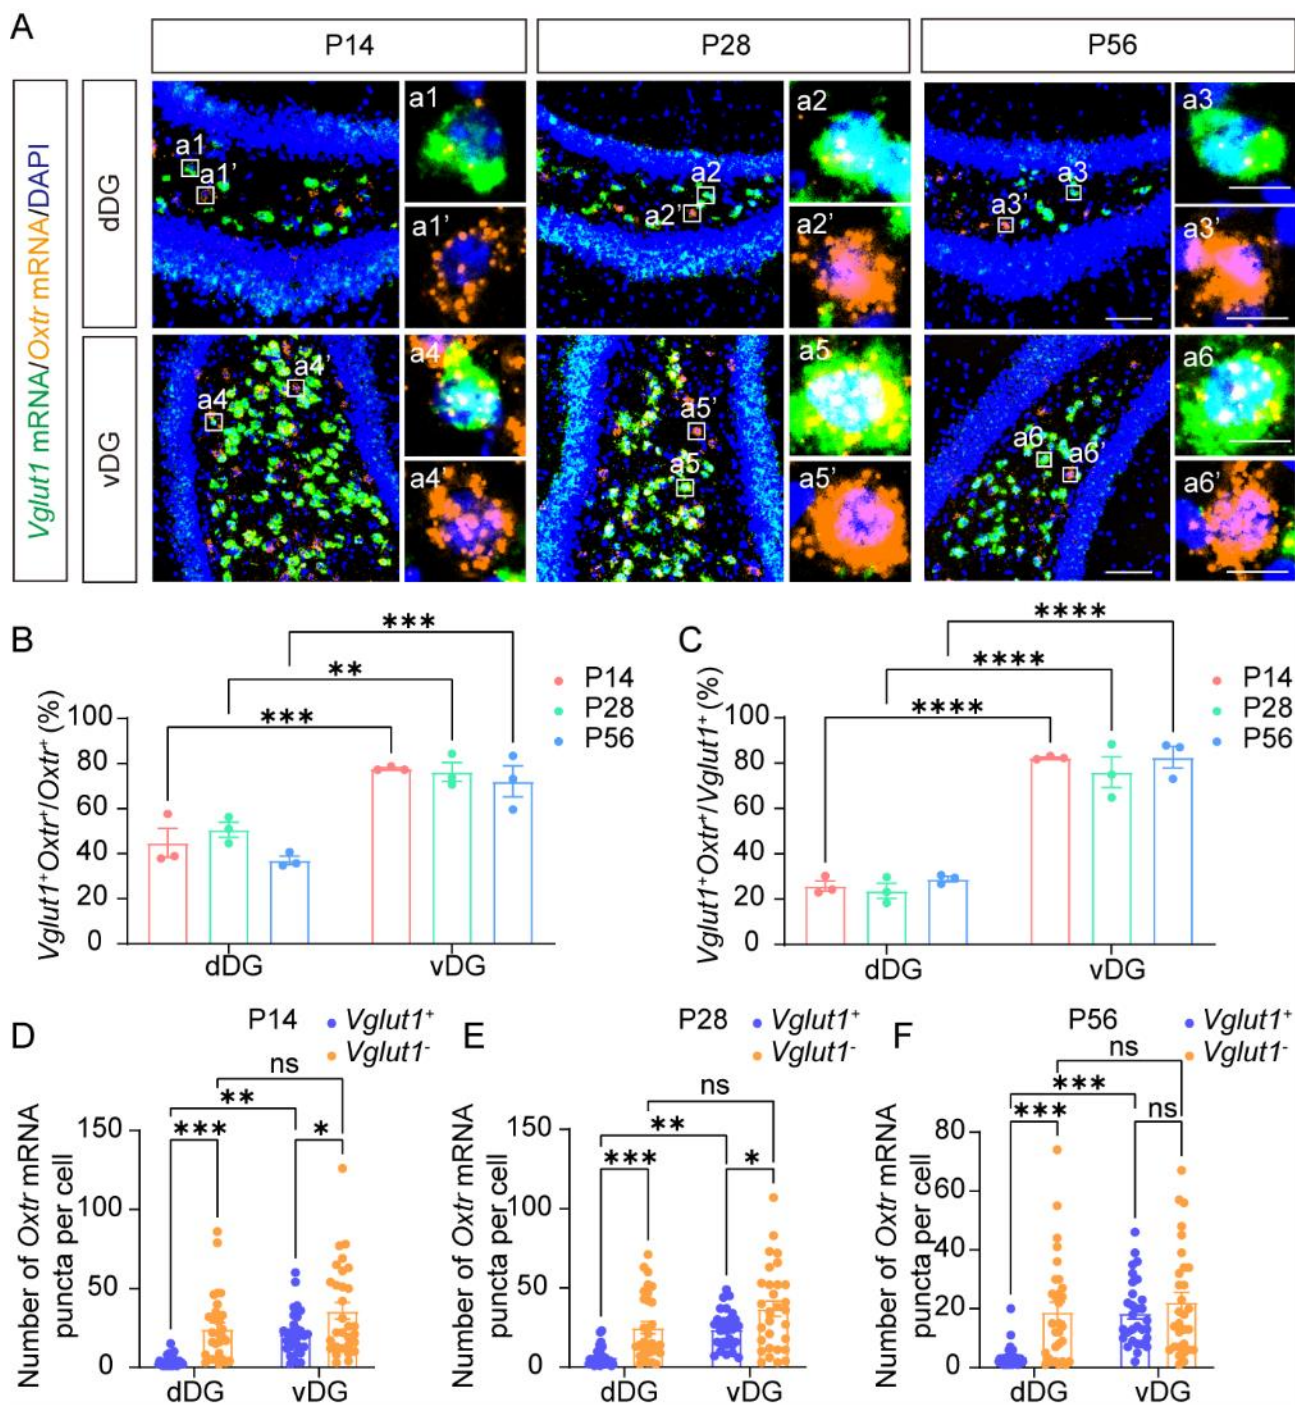

**Fig. S10** The expression patterns of *Oxt* in *Vglut1*<sup>+</sup> cells and *Vglut1*<sup>-</sup> cells in the dorsal and ventral DG. **A** Representative images of *Oxt* mRNA (orange) co-labeling with *Vglut1* mRNA (green) at different developmental stages. Scale bar, 100  $\mu$ m. **a1**-**a6** Representative images of *Vglut1*<sup>+</sup> cells. **a1'**-**a6'** Representative images of *Vglut1*<sup>-</sup> cells. Scale bar, 20  $\mu$ m. **B** The ratio of *Vglut1*<sup>+</sup> cells among *Oxt*<sup>+</sup> cells ( $n=3$ ). **C** The ratio of *Oxt*<sup>+</sup> cells among *Vglut1*<sup>+</sup> cells ( $n=3$ ). **D-F** The number of *Oxt* mRNA puncta in different cell types and regions from the DG at P14 (**D**), P28 (**E**), and P56 (**F**) ( $n=30$  cells, 3 mice). Data are presented as the mean  $\pm$  SEM, \*\*\* $P < 0.01$ , \*\*\*\* $P < 0.0001$ , two-way ANOVA with Tukey's multiple comparisons test (**D-F**) or unpaired  $t$ -test (**B, C**).

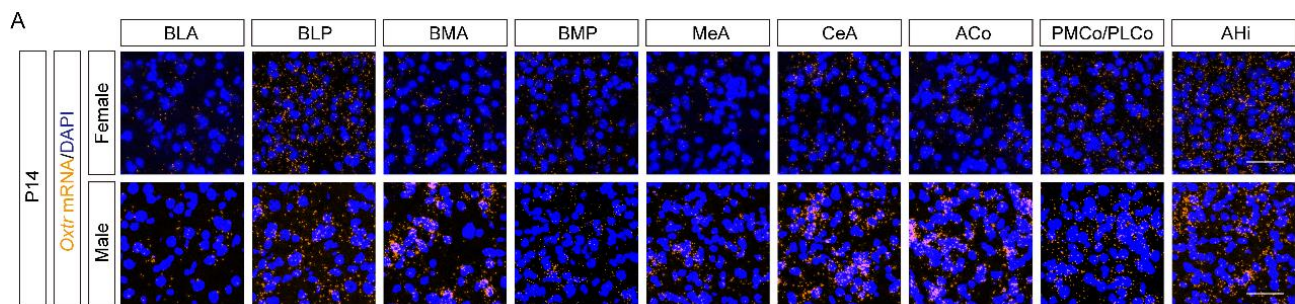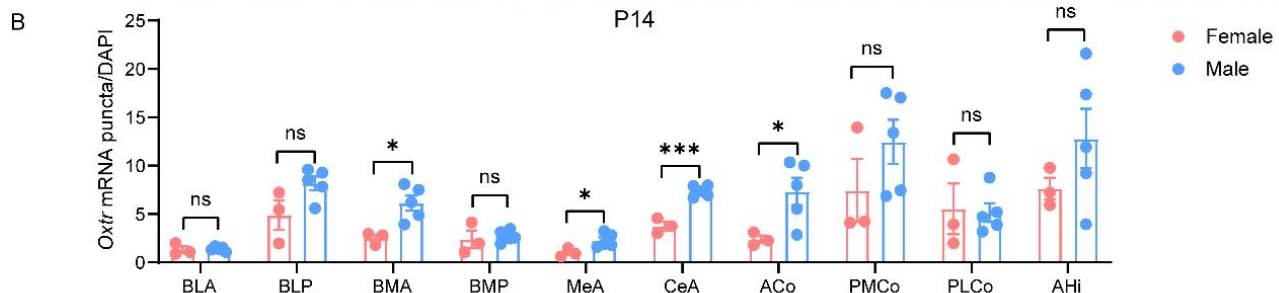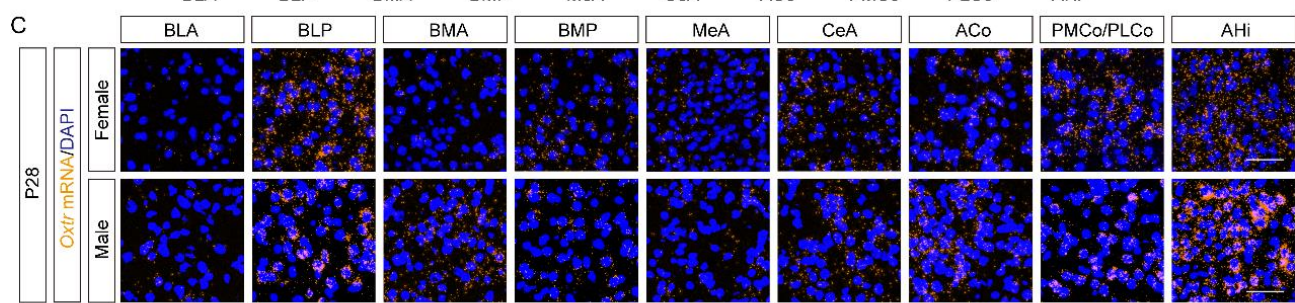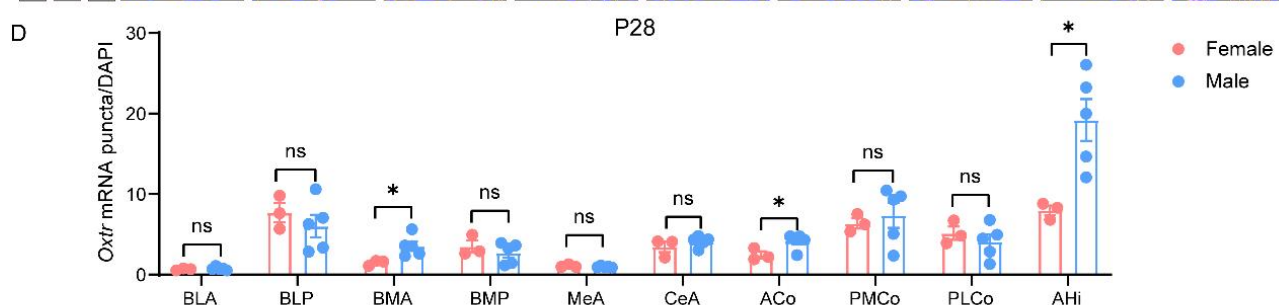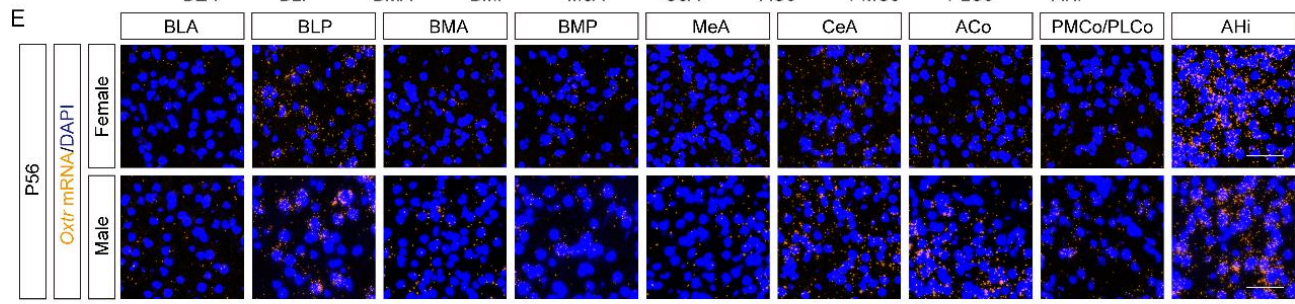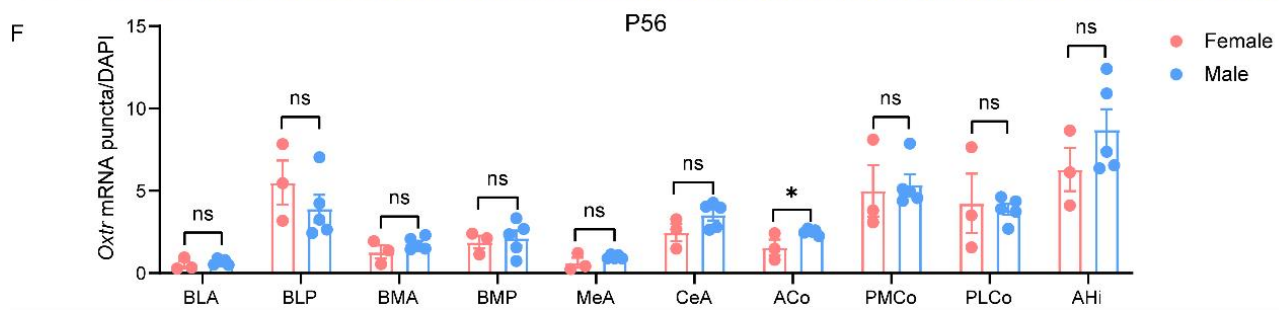

**Fig. S11** The effect of sex on the *Oxtr* expression pattern in the amygdaloid complex. **A-F** Representative images and quantitative analyses of *Oxtr* expression levels between females and males at P14 (**A, B**), P28 (**C, D**) and P56 (**E, F**) ( $n = 3$  for females,  $n = 5$  for males). Scale bar, 50  $\mu\text{m}$ . Data are presented as the mean  $\pm$  SEM,  $*P < 0.05$ ,  $***P < 0.001$ , unpaired *t*-test (**B, D, F**).
